# Supplementary material
Source: publisher figshare collection journal article supplement (https://karger.figshare.com/ndownloader/files/8714338)
Supplement: Supplementary file 1 [file 8714338]

Table S1. Candidates of polymorphism associated with angiogenic pathway

| Gene | SNPs | Reference ID | Primer sequences |
| --- | --- | --- | --- |
| *VEGFA* | -2578 A/C | rs699947 | F pyro biotin-GATGGGGCTGACTAGGTA  R pyro AGTGGGACCAGTCAGTCT  S pyro CTGATTATCCACCCAGA |
|  | -1498 (-460) C/T | rs833061 | F pyro GTGTGGGTGAGTGAGTGT  R pyro biotin-GAGAGGGACACACAGATCTA  S pyro TGCGTGTGGGGTTGA |
|  | -1154 A/G | rs1570360 | F pyro CGTGTCTCTGGACAGAGTT  R pyro biotin-GCTACCAGCCGACTTTTA  S pyro CGAGCCGCGTGTGGA |
|  | -634 (+405) C/G | rs2010963 | F pyro TAGCAAGAGCTCCAGAGAG  R pyro biotin-CAAAAGCAGGTCACTCAC  S pyro TGCGAGCAGCGAAAG |
|  | +936 C/T | rs3025039 | F pyro CGACAGAACAGTCCTTAATC  R pyro biotin-GTGGGTGTGTCTACAGGA  S pyro GGGCGGGTGACCCAG |
| *FLT1* | 27777839* A/G | rs9513070 | F pyro GCCTACTTGATGATGTATTGT  R pyro biotin-GAAATACACGGACACTGAC  S pyro ACTTGTGGCCCACGG |
|  | 27779335* G/T | rs9554316 | F pyro GGCCATCATAGACACAAA  R pyro biotin-TCTAATTGCTGGAGACCA  S pyro ATCATTCGATTTTTTTTCT |
|  | 27784927* A/C | rs9554320 | F pyro AAGGTTCCTGTGTGTAGC  R pyro biotin-AATCCCAGGACAAGATTT  S pyro TGTAGCTGATCATTCTCC |
|  | 319 A/C | rs9582036 | F pyro ACCTCAGTCTCCCAAAGT  R pyro biotin-GGCTTAAGGCATAATAGCA  S pyro CAGCAACAATAGCCTTCT |
| *KDR* | IVS25-92 A/G | rs1531289 | F pyro GCAACCAGTTAGTTTTTATTA  R pyro biotin-TTCATTAAATGCCTCTTTC  S pyro TTAGCATCTCACCTCGT |
|  | +889 C/T | rs2305948 | F pyro biotin-ATGGACCCTGACAAATGT  R pyro GGGAGTGAGATGAAGAAATT  S pyro AGCACCTTAACTATAGATGG |
|  | +1416 A/T | rs1870377 | F pyro biotin-CATTCTTCACAAGGGTATG  R pyro GCGTTGGAAGTTATTTCTA  S pyro CTGTTATCTCTTTCTTATAG |
| *IL8* | -251 A/T | rs4073 | F pyro TCTGTCACATGGTACTATGATA  R pyro biotin-TCCACAATTTGGTGAATTA  S pyro CTAGAAATAAAAAAGCATAC |
| *IL10* | -1082 A/G | rs1800896 | F pyro GGCTCTCCTTACTTTCTACA  R pyro biotin-CTCTTACCTATCCCTACTTCC  S pyro AAGGCTTCTTTGGGA |
| *CXCR2* | +785 C/T | rs2230054 | F pyro CAGTCCTTTGGCTTCATC  R pyro biotin-AGCAGGACCAGGTTGTAG  S pyro TCGTCCTCATCTTCCT |
| *COL18A1* | +4349 G/A | rs1248337 | F pyro GTTTCTCTTCCAGGACGA  R pyro biotin-TCTCAGAGCTGCTCACAC  S pyro CACGCATCTTCTCCTT |

Table S2. The distributions of single nucleotide polymorphism

| SNPs | Genotype | N (%) | MAF | HWE |
| --- | --- | --- | --- | --- |
| *VEGFA* rs699947 |  |  | 0.460 | < 0.001 |
|  | C/C | 57 (45.6) |  |  |
|  | C/A | 1 (0.8) |  |  |
|  | A/A | 67 (53.6) |  |  |
| *VEGFA* rs833061 |  |  | 0.327 | 0.567 |
|  | C/C | 15 (12.0) |  |  |
|  | C/T | 51 (40.8) |  |  |
|  | T/T | 58 (46.2) |  |  |
| *VEGFA* rs1570360 |  |  | 0.301 | 0.521 |
|  | A/A | 62 (49.6) |  |  |
|  | A/G | 48 (38.4) |  |  |
|  | G/G | 13 (10.4) |  |  |
| *VEGFA* rs2010963 |  |  | 0.396 | 0.992 |
|  | C/C | 20 (16.0) |  |  |
|  | C/G | 59 (47.2) |  |  |
|  | G/G | 46 (36.8) |  |  |
| *VEGFA* rs3025039 |  |  | 0.262 | 0.183 |
|  | C/C | 63 (50.4) |  |  |
|  | C/T | 54 (43.2) |  |  |
|  | T/T | 5 (4.0) |  |  |
| *FLT1* rs9513070 |  |  | 0.203 | 0.805 |
|  | A/A | 77 (61.6) |  |  |
|  | A/G | 42 (33.6) |  |  |
|  | G/G | 4 (3.2) |  |  |
| *FLT1* rs9554316 |  |  | 0.004 | 1.000 |
|  | G/G | 124 (99.2) |  |  |
|  | G/T | 1 (0.8) |  |  |
|  | T/T | - |  |  |
| *FLT1* rs9554320 |  |  | 0.232 | 0.650 |
|  | A/A | 8 (6.4) |  |  |
|  | A/C | 42 (33.6) |  |  |
|  | C/C | 75 (60.0) |  |  |
| *FLT1* rs9582036 |  |  | 0.209 | 0.337 |
|  | A/A | 74 (59.2) |  |  |
|  | A/C | 45 (36.0) |  |  |
|  | C/C | 3 (2.4) |  |  |
| *KDR* rs1531289 |  |  | 0.172 | 0.559 |
|  | A/A | 5 (4.0) |  |  |
|  | A/G | 33 (26.4) |  |  |
|  | G/G | 87 (69.6) |  |  |
| *KDR* rs2305948 |  |  | 0.116 | 0.984 |
|  | C/C | 97 (77.6) |  |  |
|  | C/T | 27 (21.6) |  |  |
|  | T/T | 1 (0.8) |  |  |
| *KDR* rs1870377 |  |  | 0.424 | 0.672 |
|  | A/A | 43 (34.4) |  |  |
|  | A/T | 58 (46.4) |  |  |
|  | T/T | 24 (19.2) |  |  |
| *IL8* rs4073 |  |  | 0.363 | 0.202 |
|  | A/A | 20 (16.0) |  |  |
|  | A/T | 50 (40.0) |  |  |
|  | T/T | 54 (43.2) |  |  |
| *IL10* rs1800896 |  |  | 0.085 | 0.794 |
|  | A/A | 103 (82.4) |  |  |
|  | A/G | 21 (16.8) |  |  |
|  | G/G | - |  |  |
| *CXCR2* rs2230054 |  |  | 0.459 | < 0.001 |
|  | C/C | 10 (8.0) |  |  |
|  | C/T | 112 (89.6) |  |  |
|  | T/T | - |  |  |
| *COL18A1* rs12483377 |  |  | 0.004 | 1.000 |
|  | G/G | 124 (99.2) |  |  |
|  | G/A | 1 (0.8) |  |  |
|  | A/A | - |  |  |

Figure S1. Linkage disequilibrium plot


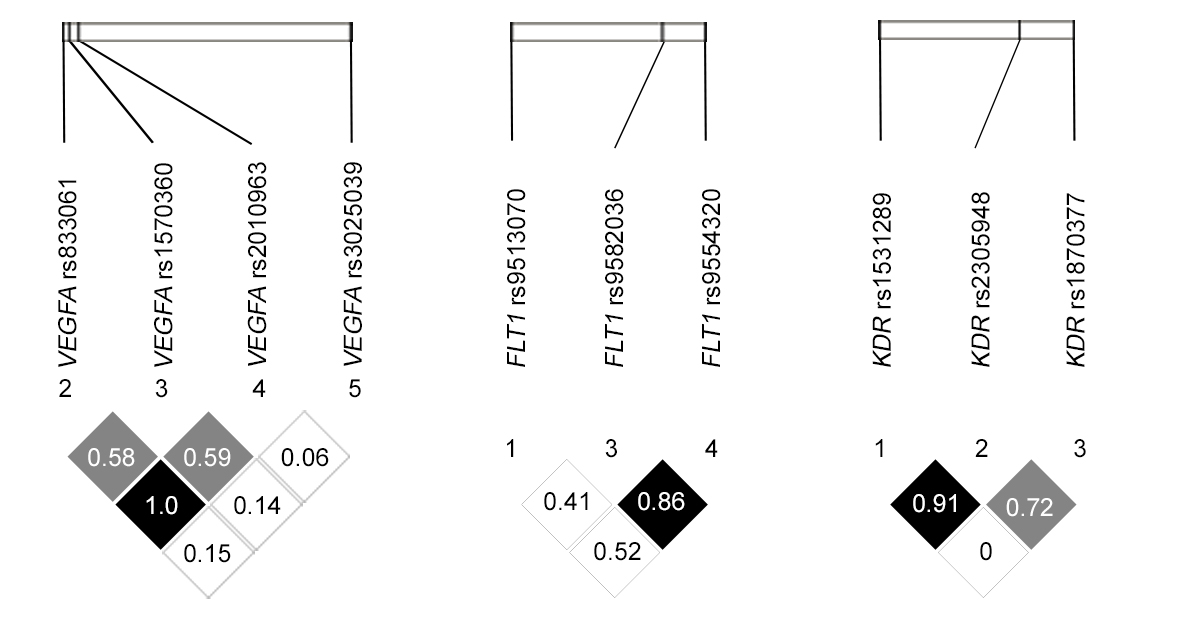


| *VEGFA* | |  | *FLT1* | |  | *KDR* | |
| --- | --- | --- | --- | --- | --- | --- | --- |
| D’ | r2 |  | D’ | r2 |  | D’ | r2 |
| 0.58 | 0.31 |  | 0.41 | 0.012 |  | 0.91 | 0.128 |
| 0.59 | 0.099 |  | 0.86 | 0.650 |  | 0.72 | 0.094 |
| 0.06 | 0.001 |  | 0.52 | 0.022 |  | 0 | 0 |
| 1.0 | 0.322 |  |  |  |  |  |  |
| 0.14 | 0.003 |  |  |  |  |  |  |
| 0.15 | 0.019 |  |  |  |  |  |  |
